# Supplementary material for: Have river flow droughts become more severe? A review of the evidence from the UK – a data-rich, temperate environment
Source: Copernicus journal article supplement (doi:10.5194/hess-29-4371-2025), 2025-09-16
Supplement: Supplementary file 1 [file hess-29-4371-2025-supplement.pdf]

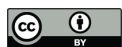

## *Supplement of*

# **Have river flow droughts become more severe? A review of the evidence from the UK – a data-rich, temperate environment**

**Jamie Hannaford et al.**

*Correspondence to:* Jamie Hannaford ([jaha@ceh.ac.uk](mailto:jaha@ceh.ac.uk))

The copyright of individual parts of the supplement might differ from the article licence.

## 1 Additional Figures and Tables

2

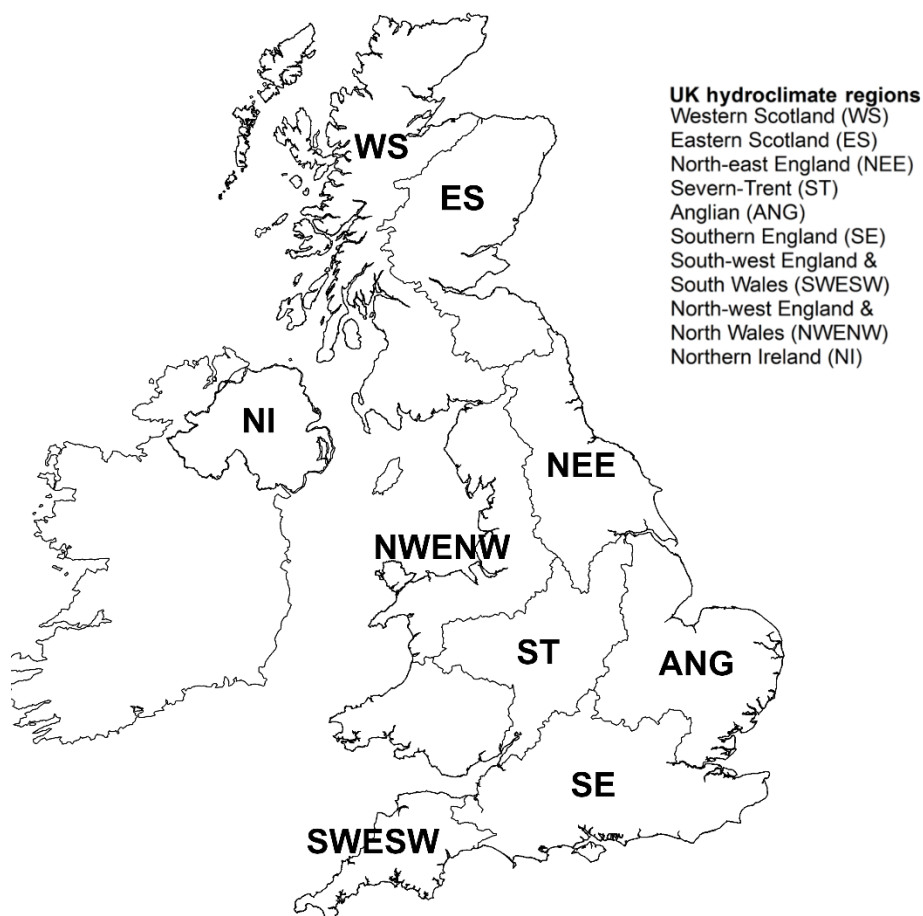

3

4

5 **Figure S1: location map showing the hydroclimate regions (after Barker et al. 2019) used in**  
6 **Figure 5 and S2, as well as the trend results tables (Tables S1 – S4)**

7

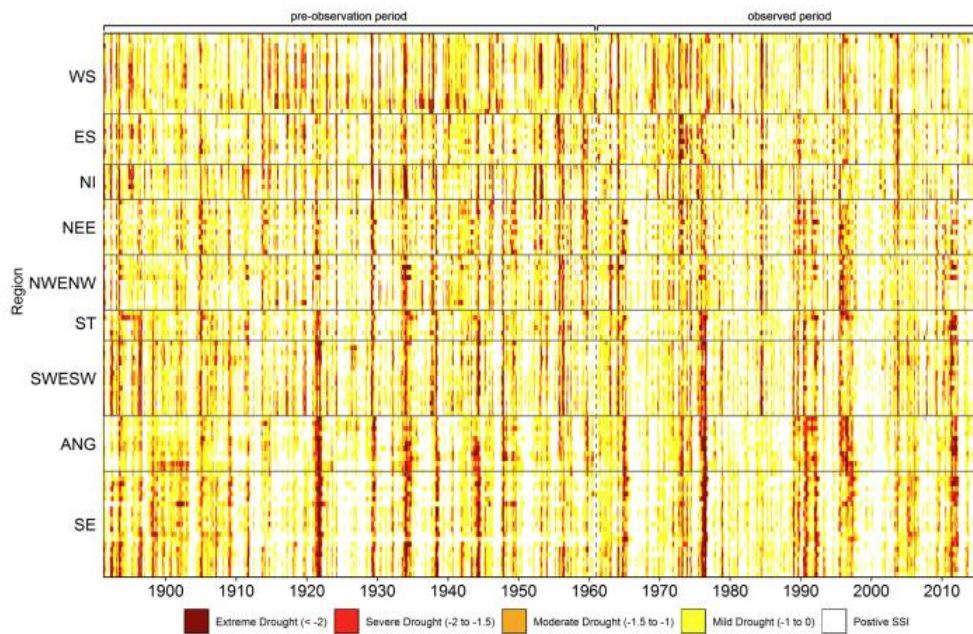

Figure S2: Heatmap of SSI-3 for LFBN catchments (arranged roughly from north to south on the y-axis with one row per catchment and regions marked for clarity) from 1891 to 2015.

**Figure S2 – Heat map of 3-month Standardised Streamflow Index (SSI-12) for Low Flows Benchmark Network (LFBN) catchments from 1891 to 2015 (catchments arranged roughly from north to south on the y axis, with one row per catchment and hydro-climatic regions marked for clarity) with colours according to SSI12 category in key. ‘Observed period’ highlights typical maximum record coverage of most gauging stations. ‘pre-observation’ the period with most added value from the reconstructions. Reproduced with permission from Barker et al. 2019. For equivalent results with SSI-3 see Figure 5.**

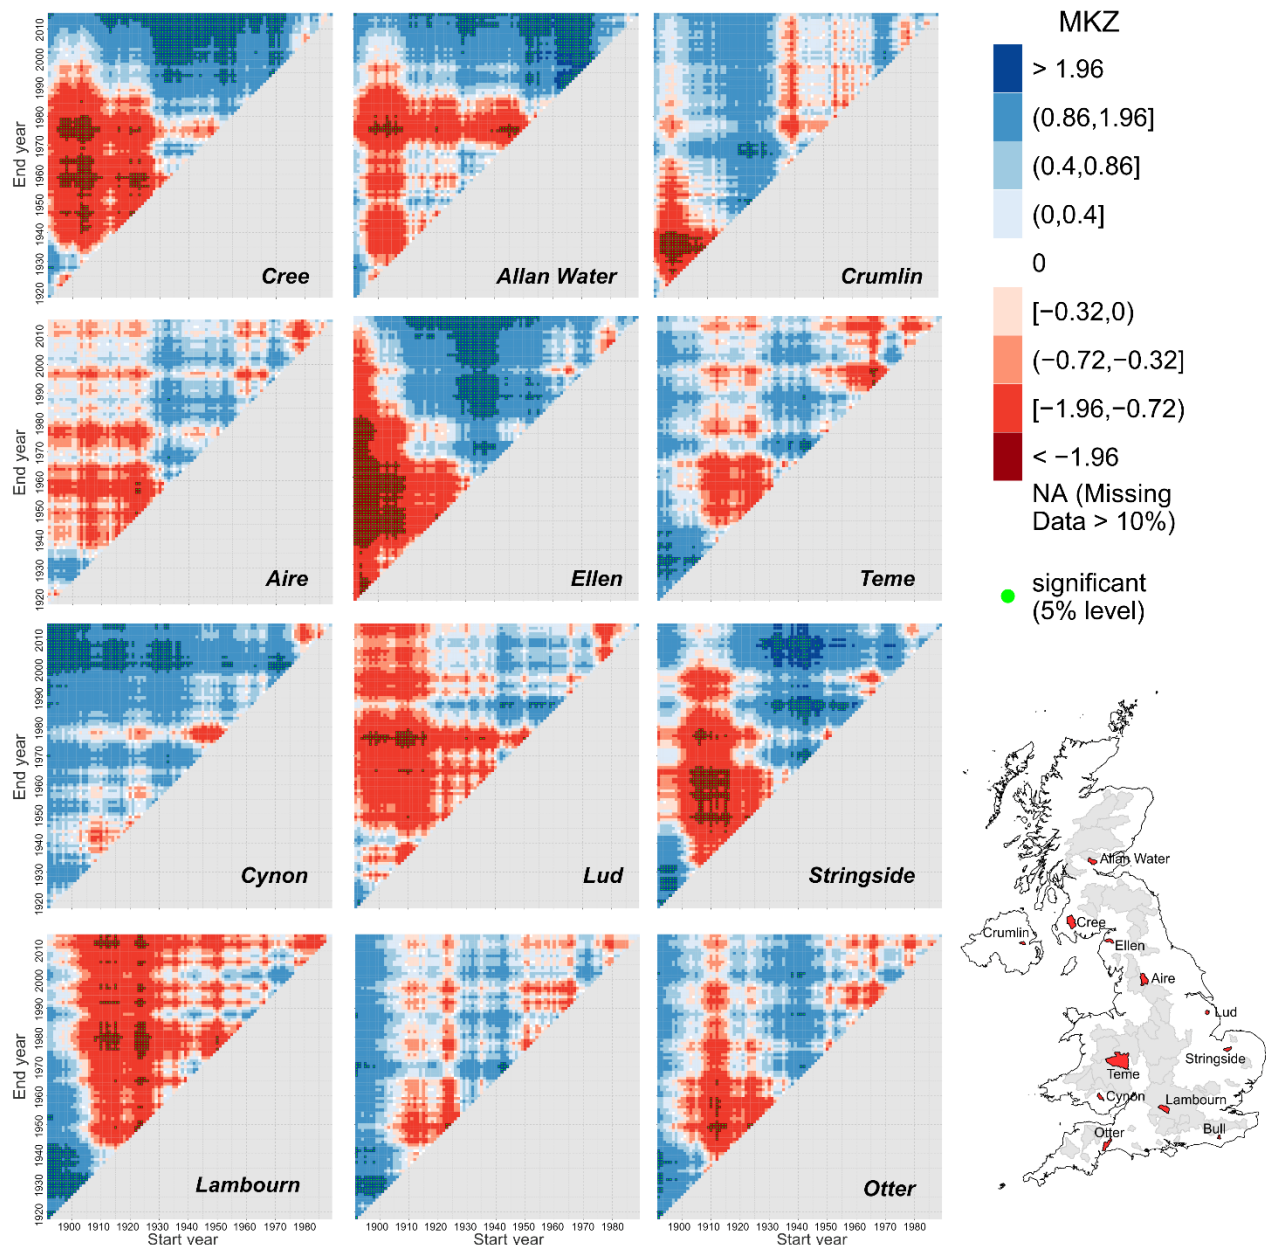

**Figure S3: Multitemporal trend analysis applied to time series of accumulated drought deficit using SSI-3 for nine selected long reconstructed records from Barker et al. 2019, and three additional catchments (Stringsides, Bull and Otter). The colour ramp denotes values of the MK Z statistic (blue = positive, red = negative) with green dots denoting significant cases. As with previous figures blue = ameliorating drought, red = worsening drought). For equivalent results for SSI-12, see Figure 6.**

## Supplementary Tables

Table S1: Summary of trend results per region of river flow indicators relevant for water resources/drought (Q95, Q70, Q50) for the period 1965 – 2022. Regions are shown in Figure S1.

| Region | No. of stations | Q95          |                      |              |                      | Q70          |                      |              |                      | Q50          |                      |              |                      |
|--------|-----------------|--------------|----------------------|--------------|----------------------|--------------|----------------------|--------------|----------------------|--------------|----------------------|--------------|----------------------|
|        |                 | Positive (%) | Sign. pos. at 5% (%) | Negative (%) | Sign. neg. at 5% (%) | Positive (%) | Sign. pos. at 5% (%) | Negative (%) | Sign. neg. at 5% (%) | Positive (%) | Sign. pos. at 5% (%) | Negative (%) | Sign. neg. at 5% (%) |
| WS     | 24              | 66.67        | 25.00                | 33.33        | 16.67                | 91.67        | 37.50                | 8.33         | 4.17                 | 91.67        | 29.17                | 8.33         | 0.00                 |
| ES     | 41              | 95.12        | 19.51                | 4.88         | 0.00                 | 85.37        | 24.39                | 14.63        | 0.00                 | 87.80        | 34.15                | 12.20        | 0.00                 |
| NEE    | 30              | 53.33        | 23.33                | 46.67        | 3.33                 | 33.33        | 13.33                | 66.67        | 3.33                 | 40.00        | 10.00                | 60.00        | 6.67                 |
| ST     | 20              | 30.00        | 0.00                 | 70.00        | 15.00                | 15.00        | 0.00                 | 85.00        | 15.00                | 0.00         | 0.00                 | 100.00       | 0.00                 |
| ANG    | 69              | 44.93        | 13.04                | 55.07        | 15.94                | 50.72        | 13.04                | 49.28        | 14.49                | 34.78        | 7.25                 | 65.22        | 13.04                |
| SE     | 66              | 48.48        | 21.21                | 51.52        | 13.64                | 42.42        | 9.09                 | 57.58        | 7.58                 | 43.94        | 6.06                 | 56.06        | 6.06                 |
| SWESW  | 39              | 71.79        | 17.95                | 28.21        | 7.69                 | 41.03        | 0.00                 | 58.97        | 2.56                 | 56.41        | 0.00                 | 43.59        | 0.00                 |
| NWENW  | 22              | 68.18        | 18.18                | 31.82        | 13.64                | 63.64        | 9.09                 | 36.36        | 9.09                 | 63.64        | 13.64                | 36.36        | 4.55                 |

Table S2: Summary of trend results per region of seasonal mean river flows for the period 1965 - 2022

| Region | No. of stations | Seasonal Mean - Autumn |                      |              |                      | Seasonal Mean - Winter |                      |              |                      | Seasonal Mean - Spring |                      |              |                      | Seasonal Mean - Summer |                      |              |                      |
|--------|-----------------|------------------------|----------------------|--------------|----------------------|------------------------|----------------------|--------------|----------------------|------------------------|----------------------|--------------|----------------------|------------------------|----------------------|--------------|----------------------|
|        |                 | Positive (%)           | Sign. pos. at 5% (%) | Negative (%) | Sign. neg. at 5% (%) | Positive (%)           | Sign. pos. at 5% (%) | Negative (%) | Sign. neg. at 5% (%) | Positive (%)           | Sign. pos. at 5% (%) | Negative (%) | Sign. neg. at 5% (%) | Positive (%)           | Sign. pos. at 5% (%) | Negative (%) | Sign. neg. at 5% (%) |
| WS     | 24              | 75.00                  | 0.00                 | 25.00        | 0.00                 | 100.00                 | 83.33                | 0.00         | 0.00                 | 33.33                  | 0.00                 | 66.67        | 0.00                 | 87.50                  | 4.17                 | 12.50        | 0.00                 |
| ES     | 41              | 95.12                  | 0.00                 | 4.88         | 0.00                 | 95.12                  | 75.61                | 4.88         | 0.00                 | 36.59                  | 0.00                 | 63.41        | 2.44                 | 97.56                  | 14.63                | 2.44         | 0.00                 |
| NEE    | 30              | 60.00                  | 0.00                 | 40.00        | 0.00                 | 90.00                  | 30.00                | 10.00        | 0.00                 | 3.33                   | 0.00                 | 96.67        | 23.33                | 40.00                  | 6.67                 | 60.00        | 3.33                 |
| ST     | 20              | 45.00                  | 0.00                 | 55.00        | 0.00                 | 80.00                  | 5.00                 | 20.00        | 0.00                 | 0.00                   | 0.00                 | 100.00       | 10.00                | 15.00                  | 0.00                 | 85.00        | 5.00                 |
| ANG    | 69              | 63.77                  | 2.90                 | 36.23        | 2.90                 | 71.01                  | 1.45                 | 28.99        | 0.00                 | 21.74                  | 0.00                 | 78.26        | 8.70                 | 40.58                  | 5.80                 | 59.42        | 17.39                |
| SE     | 66              | 62.12                  | 7.58                 | 37.88        | 0.00                 | 84.85                  | 6.06                 | 15.15        | 0.00                 | 21.21                  | 3.03                 | 78.79        | 9.09                 | 30.30                  | 9.09                 | 69.70        | 9.09                 |
| SWESW  | 39              | 100.00                 | 7.69                 | 0.00         | 0.00                 | 76.92                  | 0.00                 | 23.08        | 0.00                 | 15.38                  | 0.00                 | 84.62        | 0.00                 | 58.97                  | 2.56                 | 41.03        | 0.00                 |
| NWENW  | 22              | 54.55                  | 4.55                 | 45.45        | 4.55                 | 90.91                  | 45.45                | 9.09         | 0.00                 | 27.27                  | 4.55                 | 72.73        | 9.09                 | 68.18                  | 13.64                | 31.82        | 4.55                 |

Table S3: trend results comparing all analysed UK catchments to the UKBN2 network for river flow indicators relevant for water resources/drought (Q95, Q70, Q50) and seasonal mean river flows for the period 1965 – 2022. Please note the different numbers of sites used between the ‘ALL’ and ‘UKBN2’ catchments.

| Indicator  | Number of sites |       | Positive (%) |       | Sign. pos. at 5% (%) |       | Negative (%) |       | Sign. neg. at 5% (%) |       |
|------------|-----------------|-------|--------------|-------|----------------------|-------|--------------|-------|----------------------|-------|
|            | All             | UKBN2 | All          | UKBN2 | All                  | UKBN2 | All          | UKBN2 | All                  | UKBN2 |
| Q95        | 311             | 17    | 58.84        | 51.92 | 17.68                | 5.77  | 41.16        | 48.08 | 10.93                | 0.00  |
| Q70        |                 |       | 52.41        | 51.92 | 12.86                | 5.77  | 47.59        | 48.08 | 7.40                 | 3.85  |
| Q50        |                 |       | 51.13        | 53.85 | 11.58                | 7.69  | 48.87        | 46.15 | 3.22                 | 5.77  |
| SeasMeanA  |                 |       | 70.74        | 78.85 | 3.54                 | 1.92  | 29.26        | 21.15 | 0.96                 | 0.00  |
| SeasMeanW  |                 |       | 83.92        | 90.38 | 24.44                | 25.00 | 16.08        | 9.62  | 0.00                 | 0.00  |
| SeasMeanSP |                 |       | 20.90        | 21.15 | 0.96                 | 0.00  | 79.10        | 78.85 | 7.72                 | 5.77  |
| SeasMeanSU |                 |       | 52.09        | 46.15 | 7.40                 | 0.00  | 47.91        | 53.85 | 6.75                 | 3.85  |

48 Table S4: Summary of trend results for the UKBN2 network for hydrological drought indicators calculated from SSI3 for the period 1965 – 2022. Please note  
 49 that the numbers of stations are significantly lower than the numbers for the full network shown in Tables S1 and S2.  
 50  
 51

|        |                 | Max. intensity |                      |              |                      | Total deficit |                      |              |                      | Duration     |                      |              |                      |
|--------|-----------------|----------------|----------------------|--------------|----------------------|---------------|----------------------|--------------|----------------------|--------------|----------------------|--------------|----------------------|
| Region | No. of stations | Positive (%)   | Sign. pos. at 5% (%) | Negative (%) | Sign. neg. at 5% (%) | Positive (%)  | Sign. pos. at 5% (%) | Negative (%) | Sign. neg. at 5% (%) | Positive (%) | Sign. pos. at 5% (%) | Negative (%) | Sign. neg. at 5% (%) |
| WS     | 6               | 83.3           | 16.7                 | 16.7         | 0.0                  | 83.3          | 33.3                 | 0.0          | 0.0                  | 0.0          | 0.0                  | 100.0        | 83.3                 |
| ES     | 8               | 75.0           | 12.5                 | 25.0         | 0.0                  | 87.5          | 25.0                 | 0.0          | 0.0                  | 0.0          | 0.0                  | 100.0        | 12.5                 |
| NEE    | 4               | 25.0           | 0.0                  | 75.0         | 0.0                  | 25.0          | 0.0                  | 25.0         | 0.0                  | 25.0         | 0.0                  | 75.0         | 25.0                 |
| ST     | 7               | 0.0            | 0.0                  | 100.0        | 0.0                  | 0.0           | 0.0                  | 100.0        | 0.0                  | 100.0        | 0.0                  | 0.0          | 0.0                  |
| ANG    | 5               | 40.0           | 0.0                  | 60.0         | 20.0                 | 40.0          | 0.0                  | 60.0         | 0.0                  | 40.0         | 0.0                  | 60.0         | 0.0                  |
| SE     | 16              | 37.5           | 0.0                  | 62.5         | 0.0                  | 25.0          | 0.0                  | 75.0         | 6.3                  | 68.8         | 0.0                  | 31.3         | 0.0                  |
| SWESW  | 11              | 36.4           | 0.0                  | 63.6         | 0.0                  | 72.7          | 0.0                  | 27.3         | 0.0                  | 54.5         | 0.0                  | 45.5         | 0.0                  |
| NWENW  | 5               | 40.0           | 0.0                  | 60.0         | 0.0                  | 60.0          | 0.0                  | 40.0         | 0.0                  | 40.0         | 0.0                  | 60.0         | 20.0                 |

52
